# Supplementary material for: A structural exposé of noncanonical molecular reactivity within the protein tyrosine phosphatase WPD loop
Source: PubMed Central journal article supplement (PMC9038691; doi:10.1038/s41467-022-29673-y), 2022-04-25
Supplement: 41467_2022_29673_MOESM1_ESM.pdf [file 41467_2022_29673_MOESM1_ESM.pdf]

# Supplementary Information

## **A structural *exposé* of noncanonical molecular reactivity within the protein tyrosine phosphatase WPD loop**

Huanchen Wang<sup>1\*</sup>, Lalith Perera<sup>2</sup>, Nikolaus Jork<sup>3</sup>, Guangning Zong<sup>1</sup>, Andrew M. Riley<sup>4</sup>, Barry V.L. Potter<sup>4</sup>,  
Henning J. Jessen<sup>3</sup> and Stephen B. Shears<sup>1\*</sup>

\*Corresponding authors. Emails [shears@niehs.nih.gov](mailto:shears@niehs.nih.gov); [huanchen.wang@nih.gov](mailto:huanchen.wang@nih.gov)

### **This PDF file includes:**

Figs. 1 to 12  
Tables 1-3

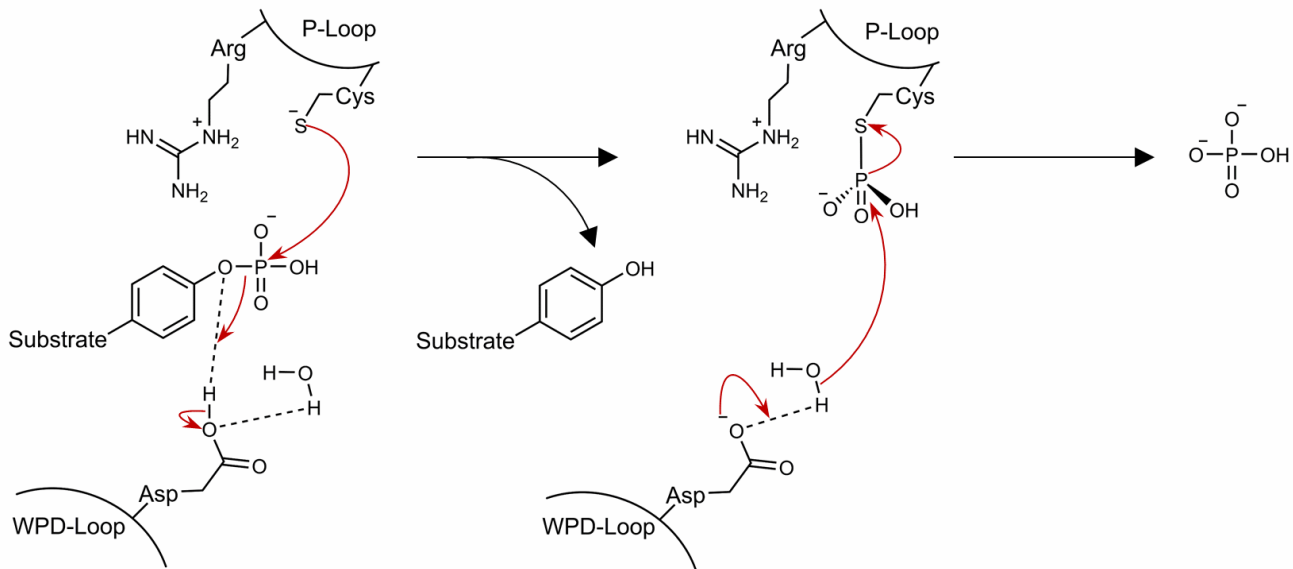

**Supplementary Figure 1.** The canonical catalytic reaction mechanism of cysteine-based protein tyrosine phosphatase (PTP). Substrate hydrolysis is assisted by a catalytic general acid/base, typically an aspartate from the WPD loop. A thiophosphate intermediate is formed during catalysis. In the next step, an aspartate residue (or glutamate in some cases) activates a water molecule for nucleophilic attack upon a thiophosphate intermediate. A free phosphate ion is formed.

**a**

|                   |     |                        |        |
|-------------------|-----|------------------------|--------|
| <i>AtPFA-DSP1</i> | 115 | GIEGNKEPFVNIP          | (7MOE) |
| <i>ScSiw14</i>    | 179 | GMSGNKEPFVNIP          | (6BYF) |
| BVP               | 80  | YKKIQVPGQTLPP          | (1YN9) |
| <i>HsCDC25B</i>   | 440 | YEGGHIKTAVNLP          | (1YMK) |
| <i>HsMCE1</i>     | 90  | KLQCK-GHG-ECP          | (1I9S) |
| <i>HsDUSP11</i>   | 113 | KIFTV-GH--QVP          | (4NYH) |
| <i>HsPTEN</i>     | 89  | PFE---DH--NPP          | (1D5R) |
| <i>HsPTP1B</i>    | 175 | HYTT <b>WPD</b> -FG-VP | (1A5Y) |
| <i>HsPTPN12</i>   | 193 | HYVN <b>WPD</b> -HD-VP | (5J8R) |

**b**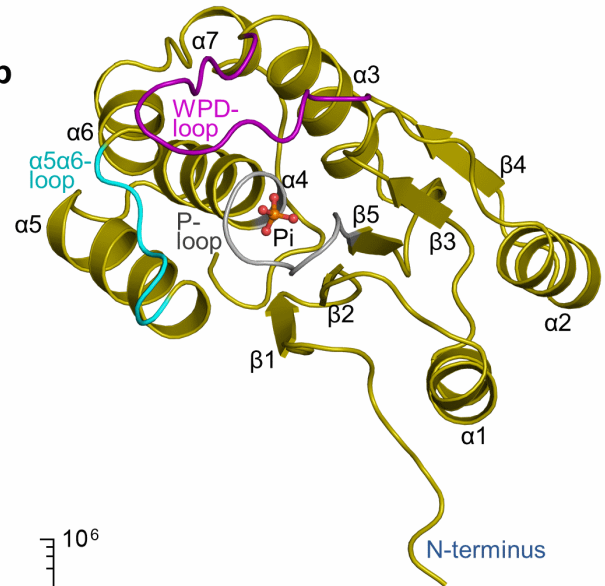**c**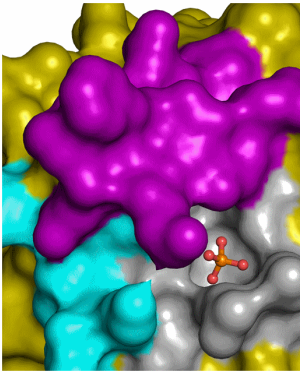**d**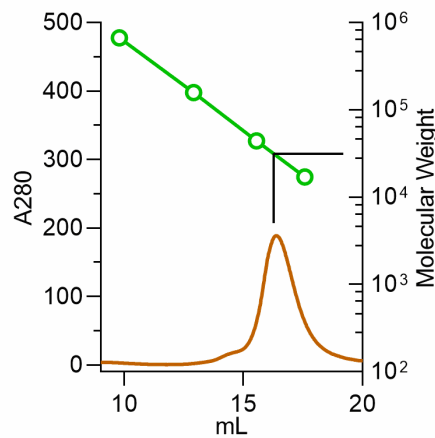**e**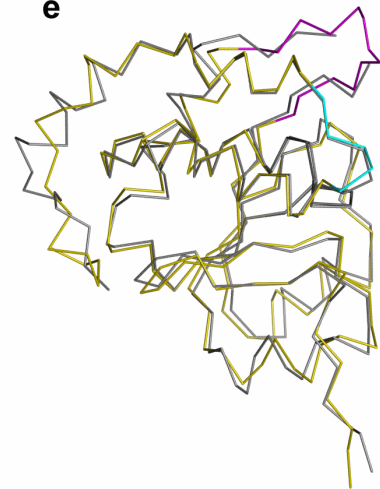**f**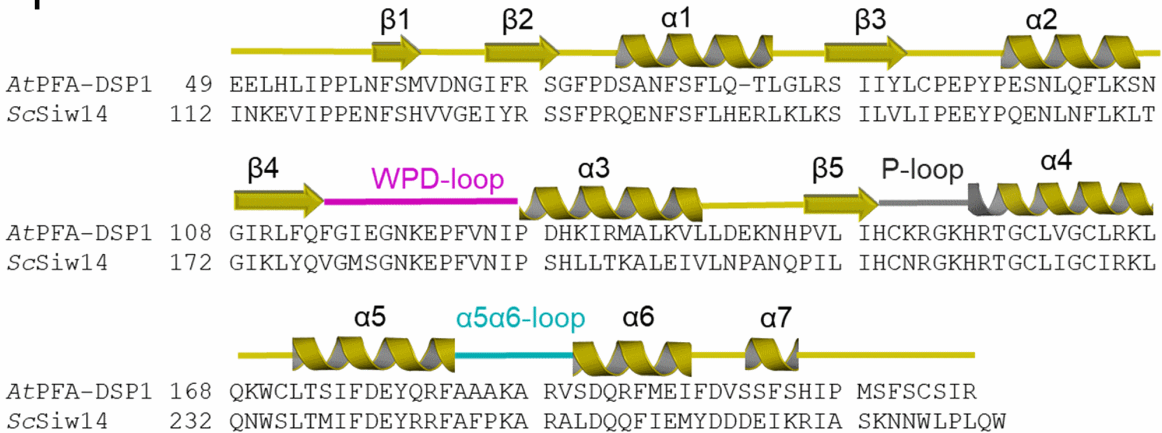

**g**

|           |                                                                 |    |
|-----------|-----------------------------------------------------------------|----|
| <i>Zm</i> | -----LVS AEELLLV PPLNFA                                         | 16 |
| <i>Dc</i> | -----SDTCRTIGV-----AVVSKSP PATGDYDDDLQFTPPFNFA                  | 35 |
| <i>Os</i> | -----GEEATLV PPLNFA                                             | 13 |
| <i>At</i> | MKLVEKTTTTEQDNGEDFCRT I IEVSEVNRNVFQAPGGEADPFRVVS GEELHLIPPLNFS | 60 |
| <i>Pp</i> | -----VVGDELNLIPPLNFA                                            | 15 |
| <i>Rc</i> | -----IPPLNFA                                                    | 7  |
| <i>Cs</i> | -----IPPLNFS                                                    | 7  |

  

|           |                                                           |                 |     |
|-----------|-----------------------------------------------------------|-----------------|-----|
|           |                                                           | <b>WPD-loop</b> |     |
| <i>Zm</i> | MVDHGVYRSGFPDASNLPFLET LRLRSVLC LCPEPYPEANLEFLRAHG IKL FQ | <b>FGIDGSK</b>  | 76  |
| <i>Dc</i> | MVDHGIYRSGFPDPTNFSFIQTLGLRSIVYLCPEPYPEANVEFLRSNGIRL FQ    | <b>FGVDGSK</b>  | 95  |
| <i>Os</i> | MVDDGIFRSGFPAAANFRFLKSLNLR SIVYLCPEYPETNAEFLAKNGIKLHQ     | <b>FGIEGRK</b>  | 73  |
| <i>At</i> | MVDNGIFRSGFPDSANFSFLQTLGLRSIIYLCPEYPESNLQFLKSNIRL FQ      | <b>FGIEGNK</b>  | 120 |
| <i>Pp</i> | MVDNGIFRSGFPDSANFAFLQTLGLRSIIICLCPEPYPEATTEFLKDG GIRLYQ   | <b>FGIEGYK</b>  | 75  |
| <i>Rc</i> | MVDNGIFRSGFPDSNNLSFLQTLGLRSIIICLCPEYPETNVEFLKSNIGIKL FQ   | <b>FGIEGYK</b>  | 67  |
| <i>Cs</i> | MVDNGIFRSGFPDSANFSFLQTLGLRSIIICLCPEYPDINMEFLKSNIRL FQ     | <b>FGIESNK</b>  | 67  |

  

|           |                                                                         |               |     |
|-----------|-------------------------------------------------------------------------|---------------|-----|
|           | <b>WPD-loop</b>                                                         | <b>P-loop</b> |     |
| <i>Zm</i> | <b>EPFVNI</b> PEDRIREAL EVILDASNHPVLIHCKR GKHRTGCVVGC FRKLQRWCLTSIFDEYQ |               | 136 |
| <i>Dc</i> | <b>EPFVNI</b> PEETIREAL KTVIDIRNHPL-IHCKR GKHRTGCVVGC LRLQRWCLTSIFDEYQ  |               | 154 |
| <i>Os</i> | <b>EPFVNI</b> PDDKIREAL KVVLDVKNQPLLIHCKR GKHRTGCVVGC LRLQKWCLSSVFDEYQ  |               | 133 |
| <i>At</i> | <b>EPFVNI</b> PDHKIRMAL KVLLDEKNHPVLIHCKR GKHRTGCLVGC LRLQKWCLTSIFDEYQ  |               | 180 |
| <i>Pp</i> | <b>EPFVNI</b> PEDTIREAL KVVLDAKNHPVLIHCKR GKHRTGCLVGC LRLQKWCLSSIFDEYQ  |               | 135 |
| <i>Rc</i> | <b>EPFINI</b> PEDTIREAL KVVLDVRNHP ILIHCKR GKHRTGCLVGC LRLQRWCLSSVFDEYQ |               | 127 |
| <i>Cs</i> | <b>EPFVNI</b> PEDTIREAL QVVLDVKNHPVLIHCKR GKHRTGCLVGC IRLQRWCLSSVFDEYQ  |               | 127 |

  

|           |                                        |     |
|-----------|----------------------------------------|-----|
|           | <b>α5α6-loop</b>                       |     |
| <i>Zm</i> | RFAAAKTRVSD LRFMELFDVSSIKHLAFESS----   | 167 |
| <i>Dc</i> | RFAAVKARVSD QRFMELFDVSTFKHIPKEFSC---   | 186 |
| <i>Os</i> | RFAAAKARSTD QRFMELFDISSLKHLTAS-----    | 162 |
| <i>At</i> | RFAAAKARVSD QRFMEIFDVSSF SHIPMSFSCSIR  | 215 |
| <i>Pp</i> | RFAAAKARVSD QRFMELFDVSTLKHMPMSFSCSKR   | 170 |
| <i>Rc</i> | RFAAAKARVAD QRFMEMFDVSSSLKHL PMPFSCSKR | 162 |
| <i>Cs</i> | RFAAAKARVSD QRFMELFDVSSSLKHQPMSFSCS--  | 160 |

**Supplementary Figure 2. Overall structure of *AtPFA-DSP1*<sup>49-215</sup>.** **a**, A structure-based, manual alignment of the amino-acid sequences of the WPD loops of PTP1B and PTPN12 (WPD motif highlighted in bold font), plus the sequences of corresponding loops in proteins that each lack the WPD motif. PDB numbers given in parentheses. The arrow highlights a conserved Pro residue that may act as a hinge to help direct the range of motion of the loop. **b**, Ribbon diagram of *AtPFA-DSP1*<sup>49-215</sup> in complex with trapped Pi. Coloring and naming of structural elements correspond to those previously used for *ScSiv14*<sup>1</sup>: grey for P-loop, cyan for α5-α6 loop, purple for WPD-loop, and yellow for the remainder. The Pi is depicted in ball and stick format (phosphorus is colored orange, and oxygen is red) **c**, Surface representation colored to match the structural elements shown in panel a. **d**, Gel filtration analysis. The apparent molecular weight is 22.0 kDa which is consistent with the theoretical monomeric molecule weight 19.6 kDa. **e**, Superimposition of Ca traces of *ScSiv14*<sup>116-281</sup> (PDB accession code 6BYF; transparent white) and *AtPFA-DSP1*<sup>49-215</sup> (PDB accession code 7MOK; yellow). **f**, Sequence alignment of *AtPFA-DSP1*<sup>49-215</sup> and

ScSiw14<sup>112-281</sup>. The secondary structural elements are also given above the alignment. **g**, Candidate orthologs of *AtPFA-DSP1* identified through a BLAST search of several plant genomes assembled into the EnsemblPlants database (<https://plants.ensembl.org>). These sequences were aligned with Clustal Omega. The indicated loop sequences are those identified for *AtPFA-DSP1*. Accession numbers are as follows: *Zm*, *Zea mays*, Zm00001eb095500\_P001; *Os*, *Oryza sativa*, ASM465v1; *Dc*, *Daucus carota* ASM162521v1; *Pp*, *Populus trichocarpa* POPTR\_014G159100v3; *Rc*, *Rosa chinensis*, RchiOBHm-V2; *Cs*, *Cannabis sativa* evm.TU.10.1109.

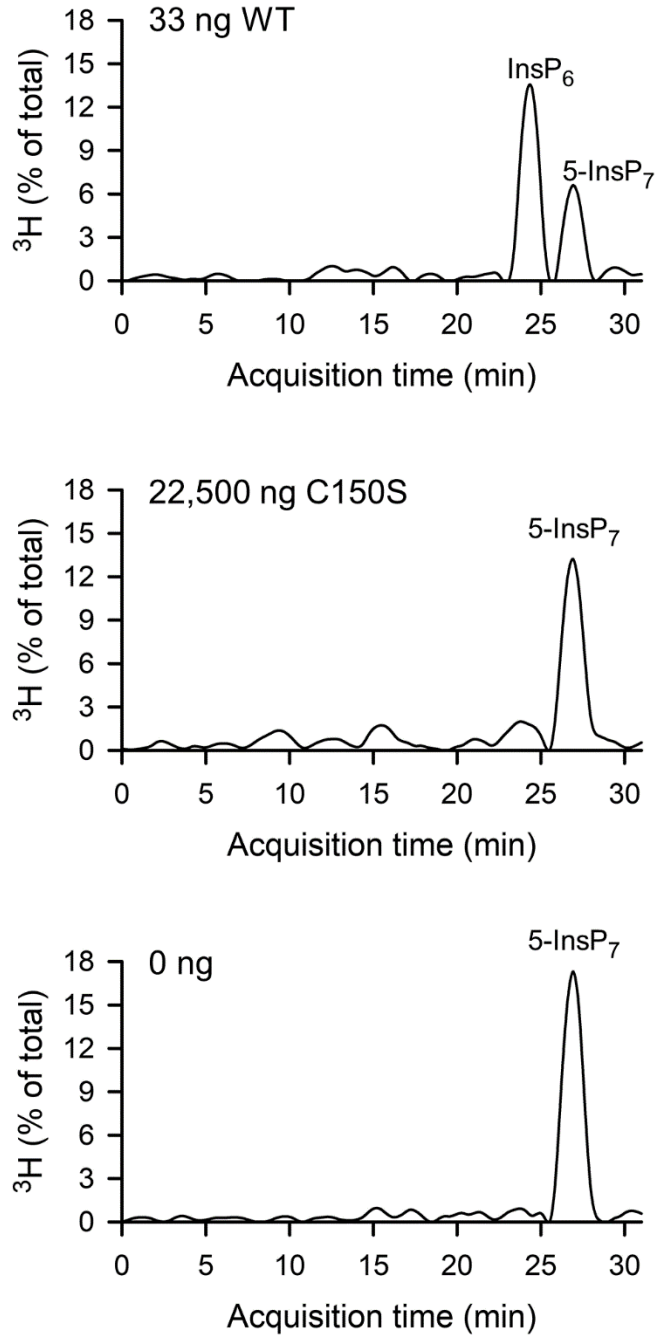

**Supplementary Figure 3. HPLC analysis of the activity of WT and C150S *AtPFA-DSP1*<sup>49-215</sup> towards 5-<sup>3</sup>H]InsP<sub>7</sub>.** HPLC analysis of enzyme assays was performed as described in the Methods; <sup>3</sup>H-elution profiles were exported from the in-line BetaRam radioisotope detector into SigmaPlot, which performed Loess smoothing and peak integrations. A representative dataset is shown. Mean values of reaction rates for the WT and C150S mutant are (means ± standard errors from 6 independent experiments): 593 ± 54 and 0.15 ± 0.03 nmol min<sup>-1</sup> mg<sup>-1</sup> respectively. Source data are provided as a Source Data file.

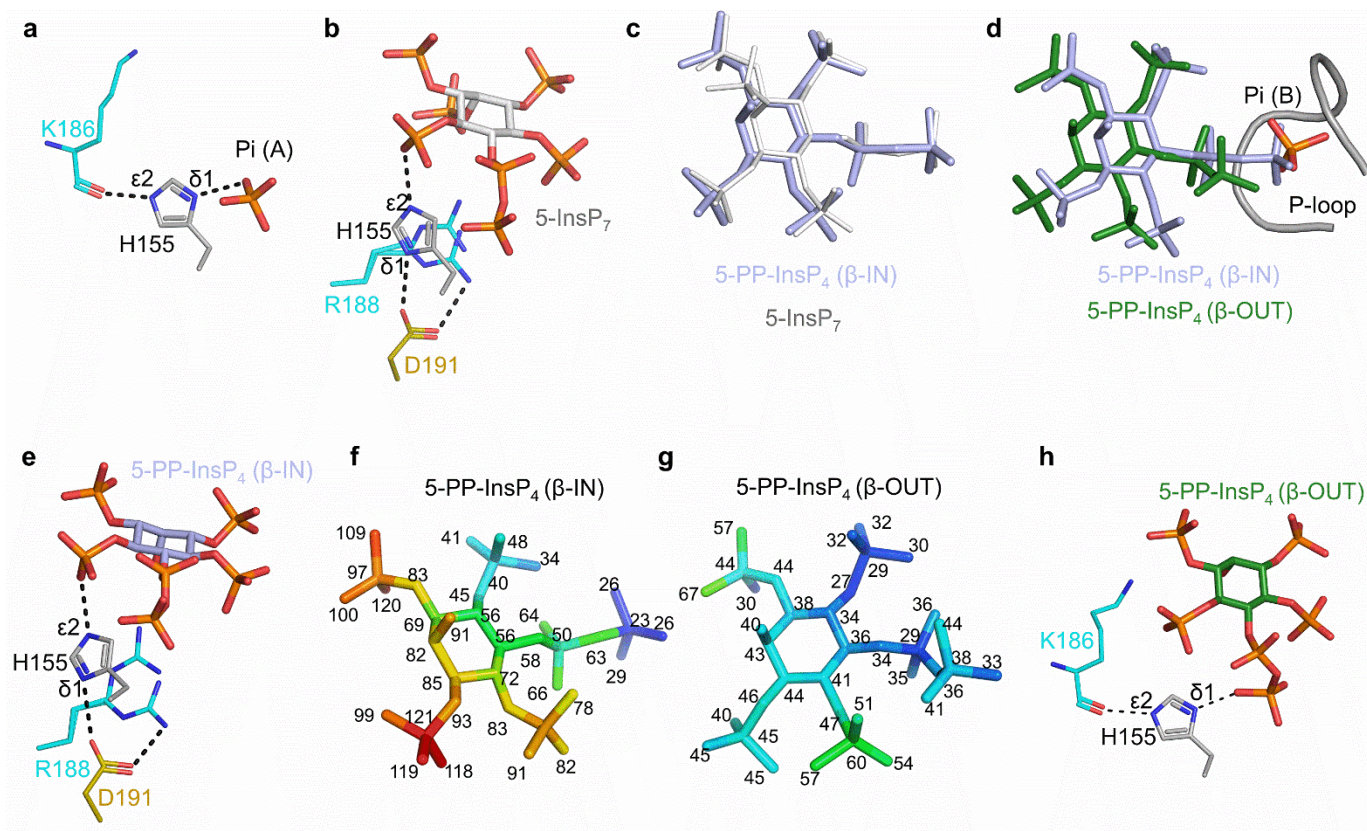

**Supplementary Figure 4. Orientations of various *AtPFA-DSP1* ligands and their interactions with His155.** In the stick format graphics, phosphorus is orange, oxygen is red, and nitrogen is dark blue (unless otherwise indicated), and the coloration of the protein reflects various structural elements, i.e., P-loop: carbon is gray,  $\sigma 5/\sigma 6$  loop, carbon is cyan;  $\sigma 6$  helix, carbon is gold. Polar contacts are depicted with broken black lines. Panel **a** shows polar contacts that involve residue His155 when the catalytic pocket contains Pi(A). Panel **b** shows polar contacts that involve residue His155 and D191 when 5-InsP<sub>7</sub> is bound. Panel **c** is a superimposition of bound 5-InsP<sub>7</sub> and the  $\beta$ -IN pose of 5-PP-InsP<sub>4</sub>. Panel **d** is a superimposition of 5-PP-InsP<sub>4</sub> in the  $\beta$ -IN (lavender) and  $\beta$ -OUT (green) orientations (the centers of each carbon ring are 1.4 Å apart). Panels **e** show polar contacts that involve His155 and D191 when the catalytic pocket contains 5-PP-InsP<sub>4</sub>  $\beta$ -IN. Panels **f** and **g** show  $\beta$ -factor values (rainbow format: dark blue = 20, red = 120) for 5-PP-InsP<sub>4</sub> in the  $\beta$ -OUT and  $\beta$ -IN orientations, respectively. Panels **h** show polar contacts that involve His155 and D191 when the catalytic pocket contains 5-PP-InsP<sub>4</sub>  $\beta$ -OUT. Source data are provided as PDB accession code 7MOH.

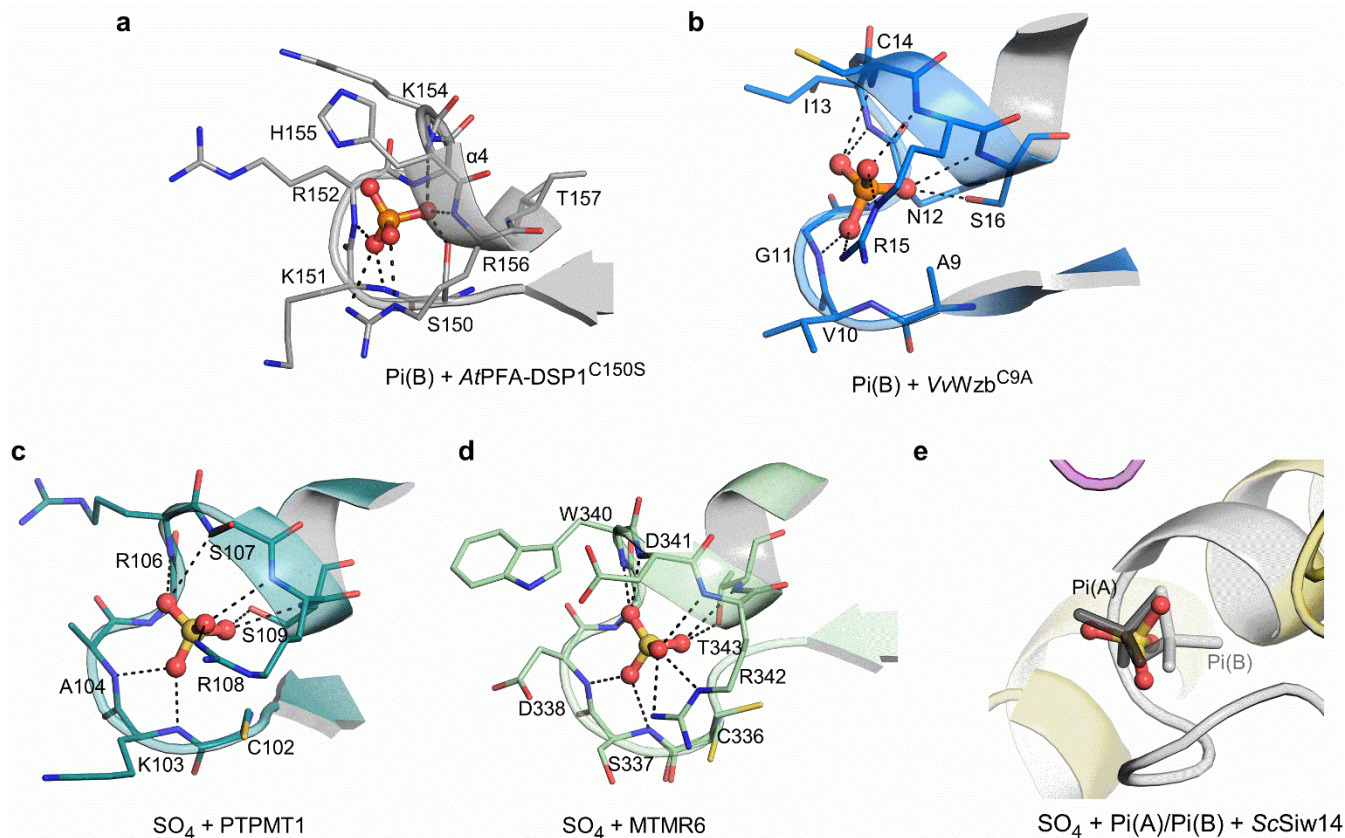

**Supplementary Figure 5. Structures of the catalytic pockets of selected PTPs with either Pi or a sulfate ion. a,** *AtPFA-DSP*<sup>149-215,C150S</sup> in complex with PP-InsP4 OUT (not shown) and Pi in pose B. **b,** *VvWzb*<sup>Cys9Ala</sup> in complex Pi in pose B (PDB: 7DHF). **c, d,** PTPMT1 (PDB: 3RGO) and MTMR6 (PDB: 2YFO) respectively, each of which contains a sulfate ion in a configuration that closely mimics the Pi(B) conformation. **e,** superimposition of sulfate, in crystal complex with *ScSiw14* (PDB: 6E3B), upon Pi(A) (see Fig 2a in the main text; dark gray) and Pi(B) (see Fig. 5a in the main text; light gray) in complex with *AtPFA-DSP1*. In each panel, relevant aspects of each protein are shown in a mixture of ribbon and stick formats. Nitrogens are blue, oxygens are red, and sulfur is orange. Broken black lines depict polar interactions with the bound ion, depicted in stick and ball format.



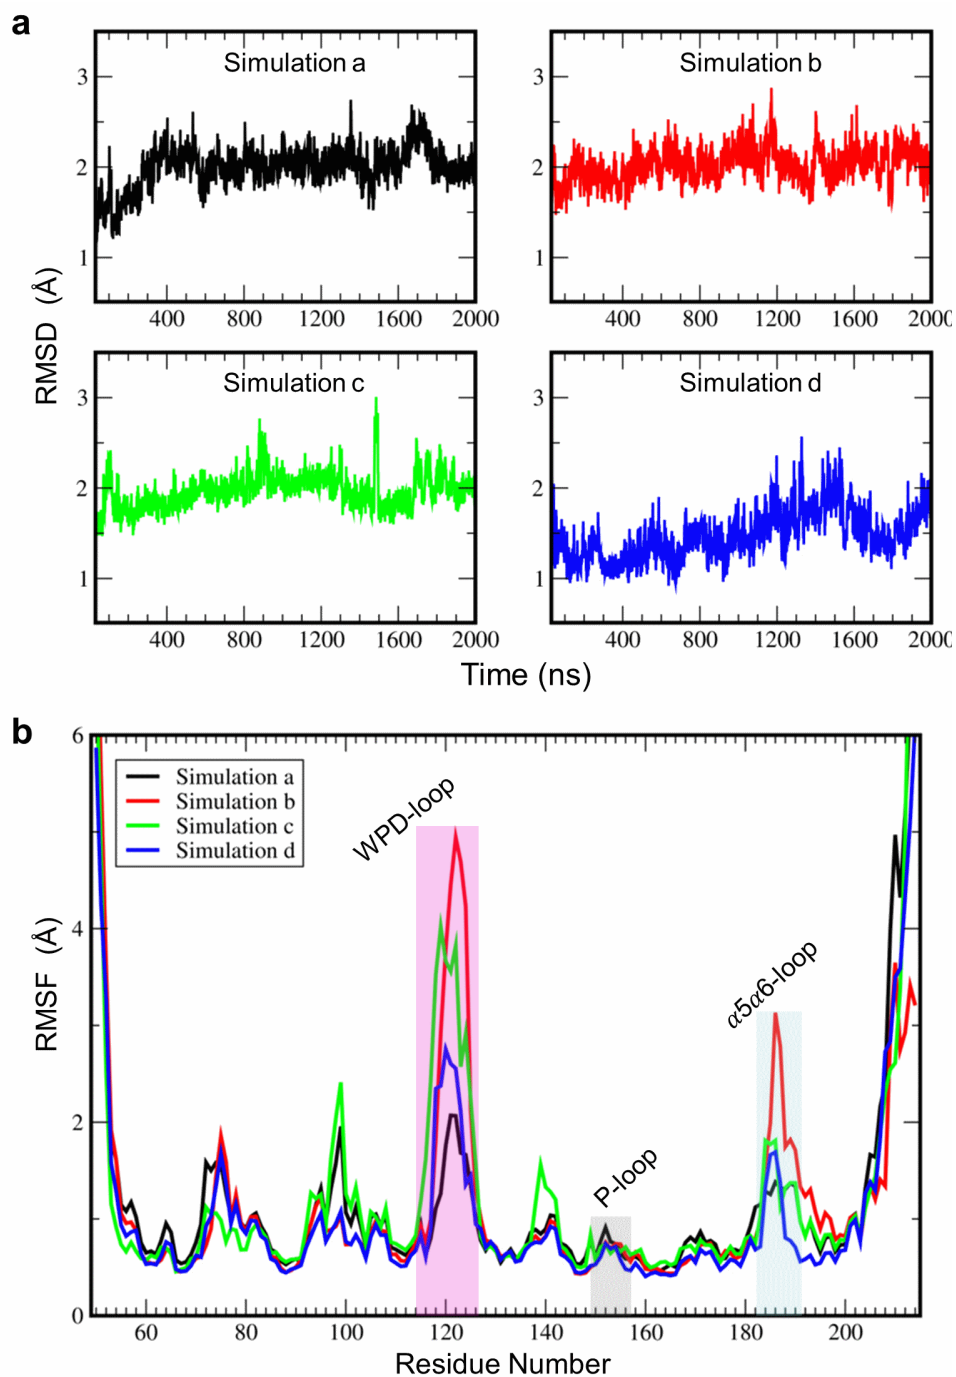

**Supplementary Figure 6. Molecular dynamics simulations of global and local fluctuations of *AtPFA-DSP1*<sup>49-215</sup>.** Four separate 2 $\mu$ s molecular dynamics simulations were initiated with a crystal complex of *AtPFA-DSP1*<sup>49-215</sup> with Pi(A) as the ligand (PDB accession code 7MOK; Supplementary Table 1). **a**, the root mean square deviations of the heavy backbone atoms of *AtPFA-DSP1*<sup>49-215</sup>; simulation a is the source of the data given in Fig. 5d,e in the main text. The colors of each trace are retained in Supplementary Figures 9 and 10 to facilitate comparisons. **b**, root mean square fluctuations for backbone C $\alpha$  atoms; line coloring corresponds to each of the simulations shown in

panel a. The WPD-loop, P-loop and  $\alpha 5\alpha 6$ -loops are highlighted with purple, gray and blue shading, respectively. Source data are provided as a Source Data file.

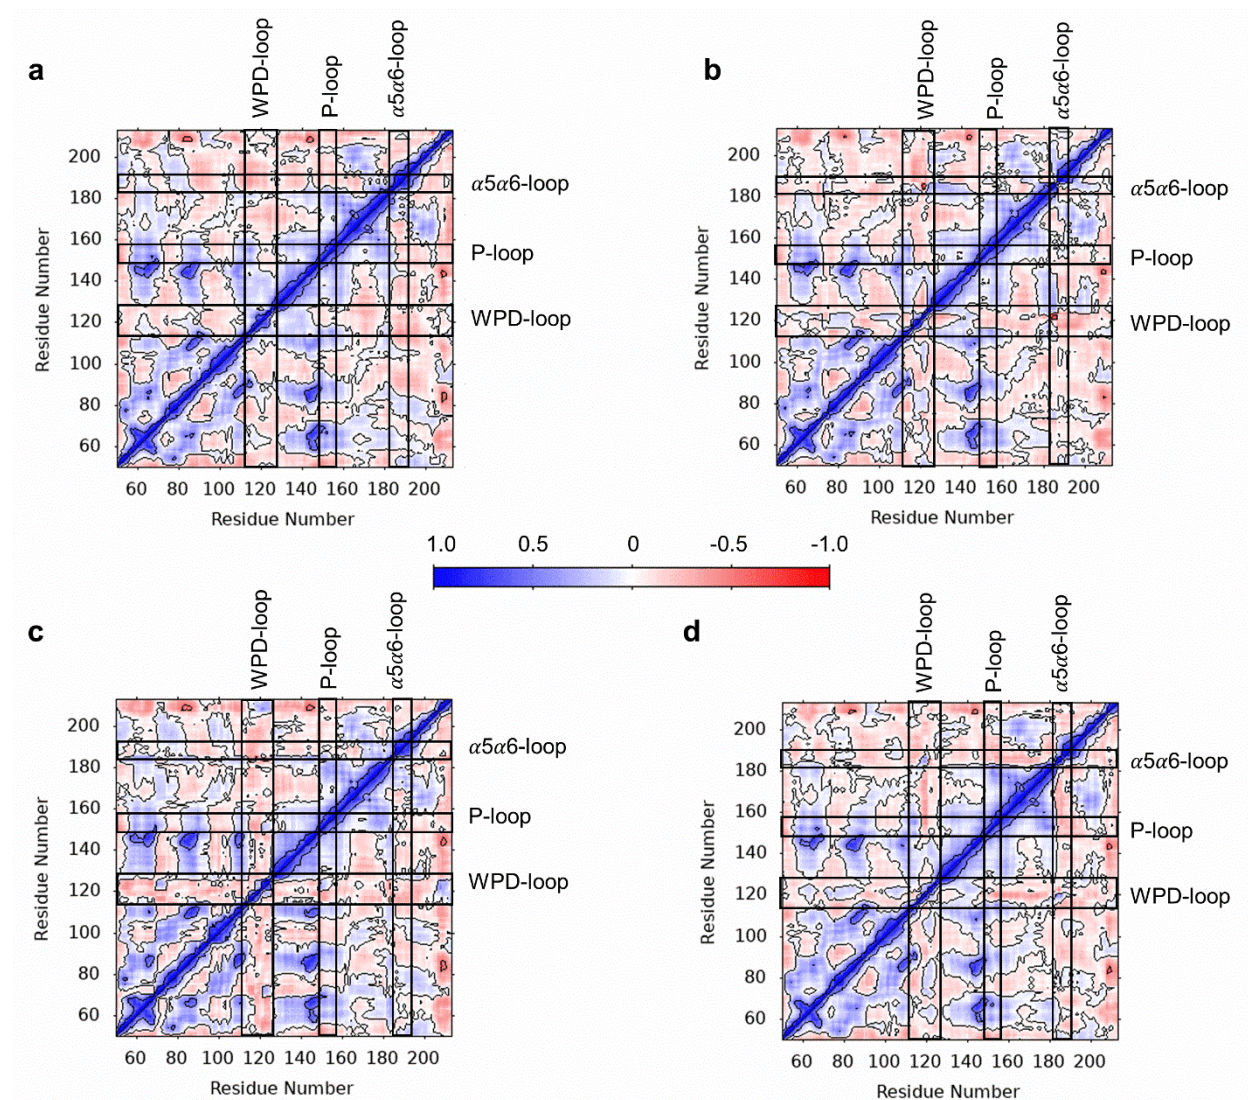

**Supplementary Figure 7. Dynamic cross correlation matrix obtained from molecular dynamics simulations of *AtPFA-DSP1*<sup>49-215</sup>.** The data in panel a are derived from the simulation provided in Fig. 5 d,e in the main text. Data in panels b, c and d were derived from the simulations b,c and d described in Supplementary Fig. 6. Dynamic cross correlations between residue pairs (presented as a heat map) were calculated from the distances between their C $\alpha$  atoms. The central horizontal bar is the key to the heat map that represents the degree of correlation (blue) or anti-correlation (red). Source data are provided as a Source Data file.

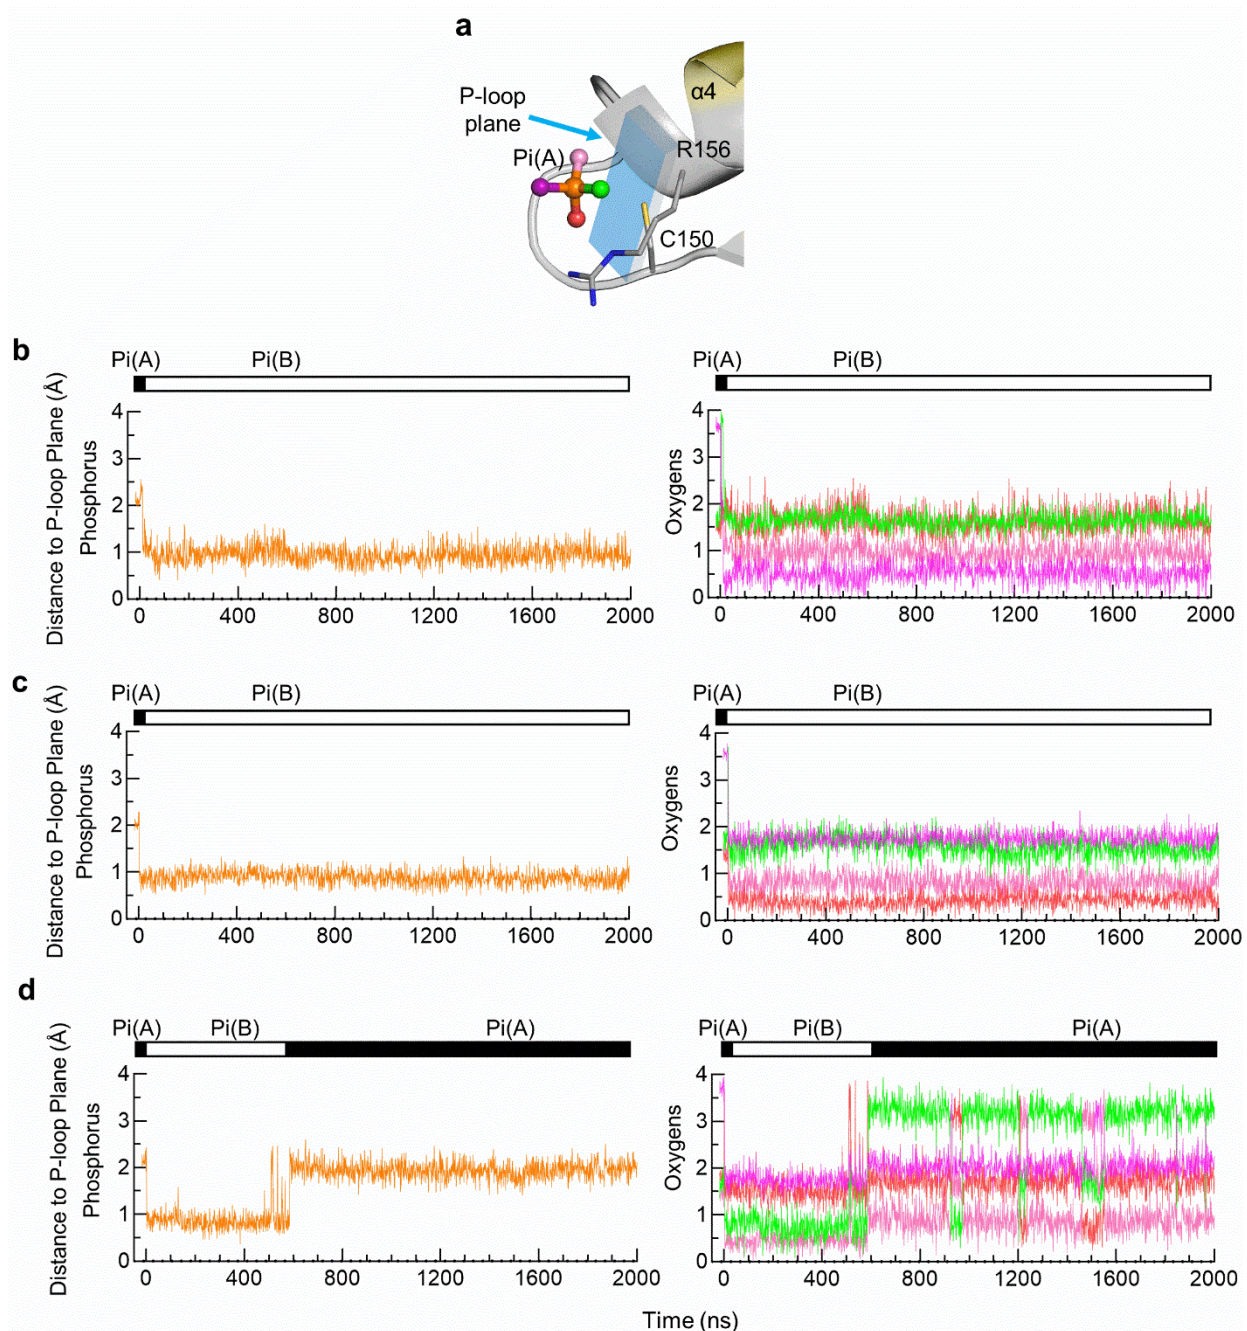

**Supplementary Figure 8. Molecular dynamics simulations of phosphate mobility inside the catalytic center of *At*PFFA-DSP1<sup>49-215</sup>.** Panel **a**, initial configuration of Pi(A) for the simulations, in relation to the P-loop plane (see also Fig. 5e in the main text). Panels **b**, **c** and **d** depict the simulated movements of individual atoms of di-anionic Pi, relative to the fixed P-loop plane; data were sourced from simulations b,c and d described in Supplementary Fig. 6a. Horizontal bars illustrate the switching between Pi poses A (white) and B (black). Source data are provided as a Source Data file.

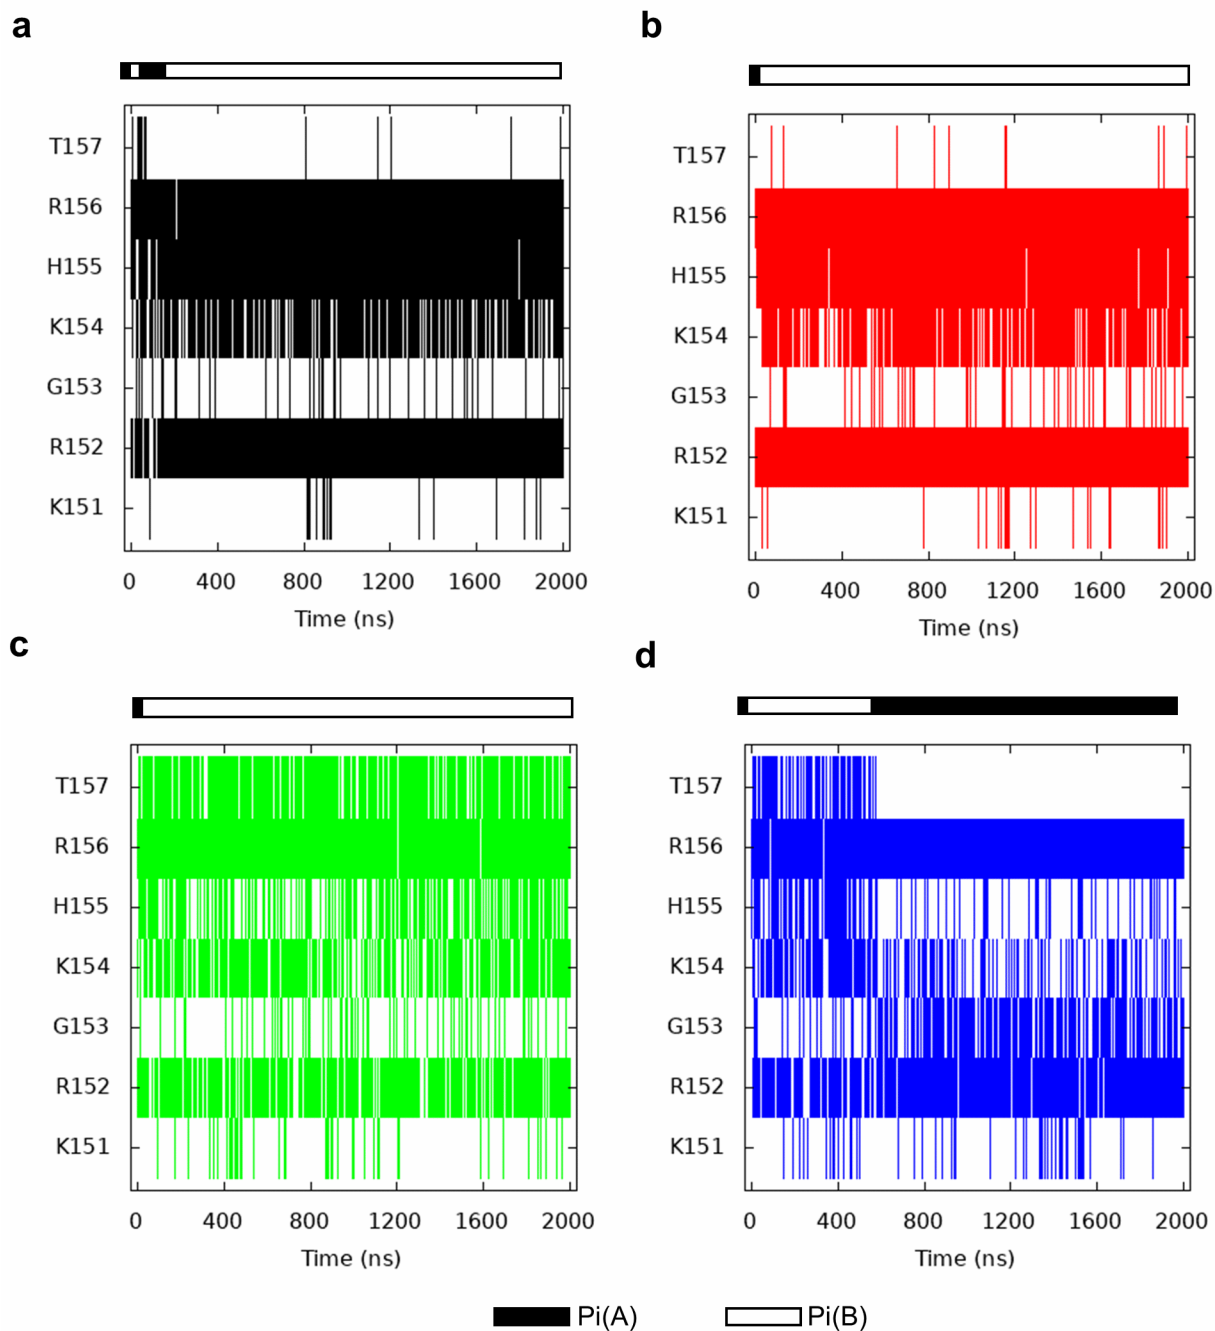

**Supplementary Figure 9. Simulated ionic interactions between bound Pi and P-loop residues in *AtPFA-DSP1*<sup>49-215</sup>.** The data in panel a are sourced from the simulation shown in Fig. 5 d,e in the main text.. Data in panels b, c and d were derived from Supplementary Fig. 6a,b (simulations b, c and d respectively; the same color coding is retained). Horizontal bars illustrate the switching between Pi poses A (black) and B (white). Source data are provided as a Source Data file.

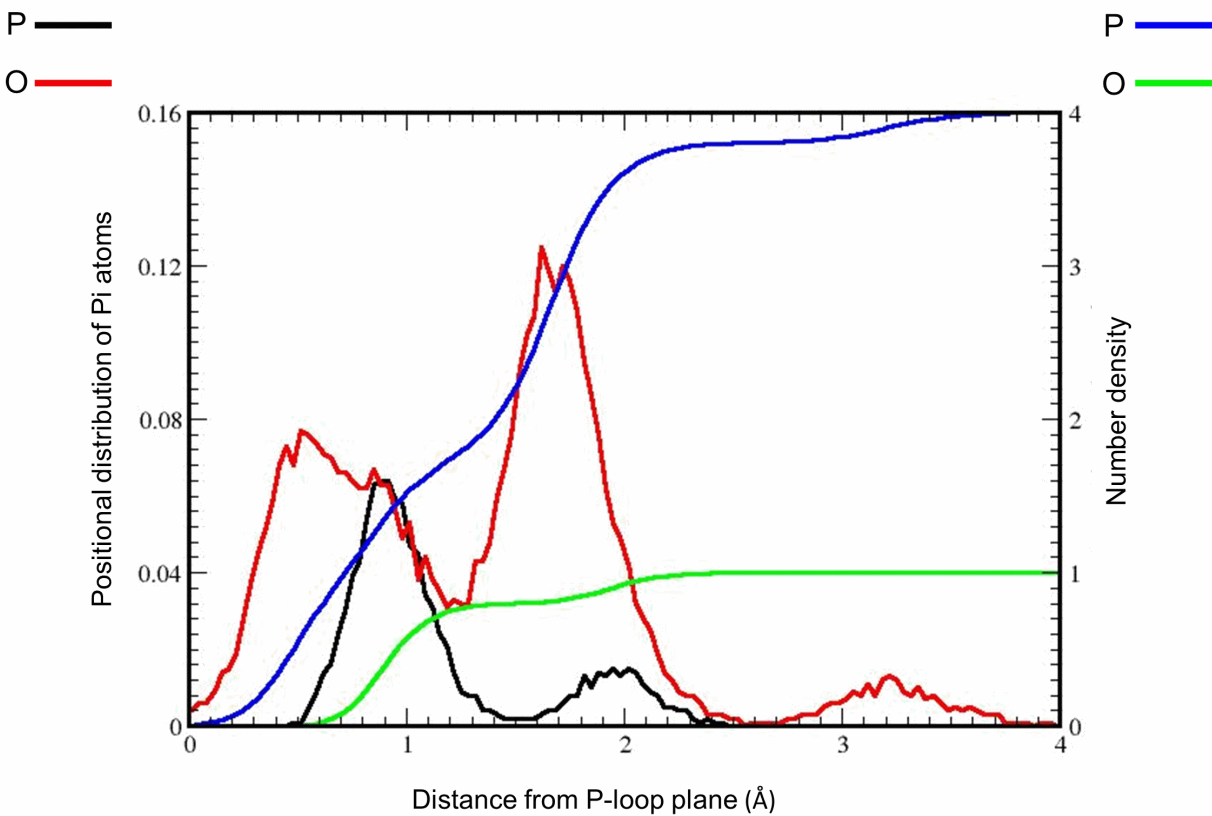

**Supplementary Figure 10. Distributions of atomic distances from Pi atoms to the P-loop plane of *At*PPFA-DSP1<sup>49-215</sup>.** These data are collected from all four simulations (Supplementary Fig. 5a). The left-hand y-axis shows the positional distribution of phosphorous (P; black line) and all four oxygens (O; red line). The right-hand y-axis shows the number density of phosphorous (P; blue line) and all oxygen atoms (green line). The source data are provided as a Source Data file.

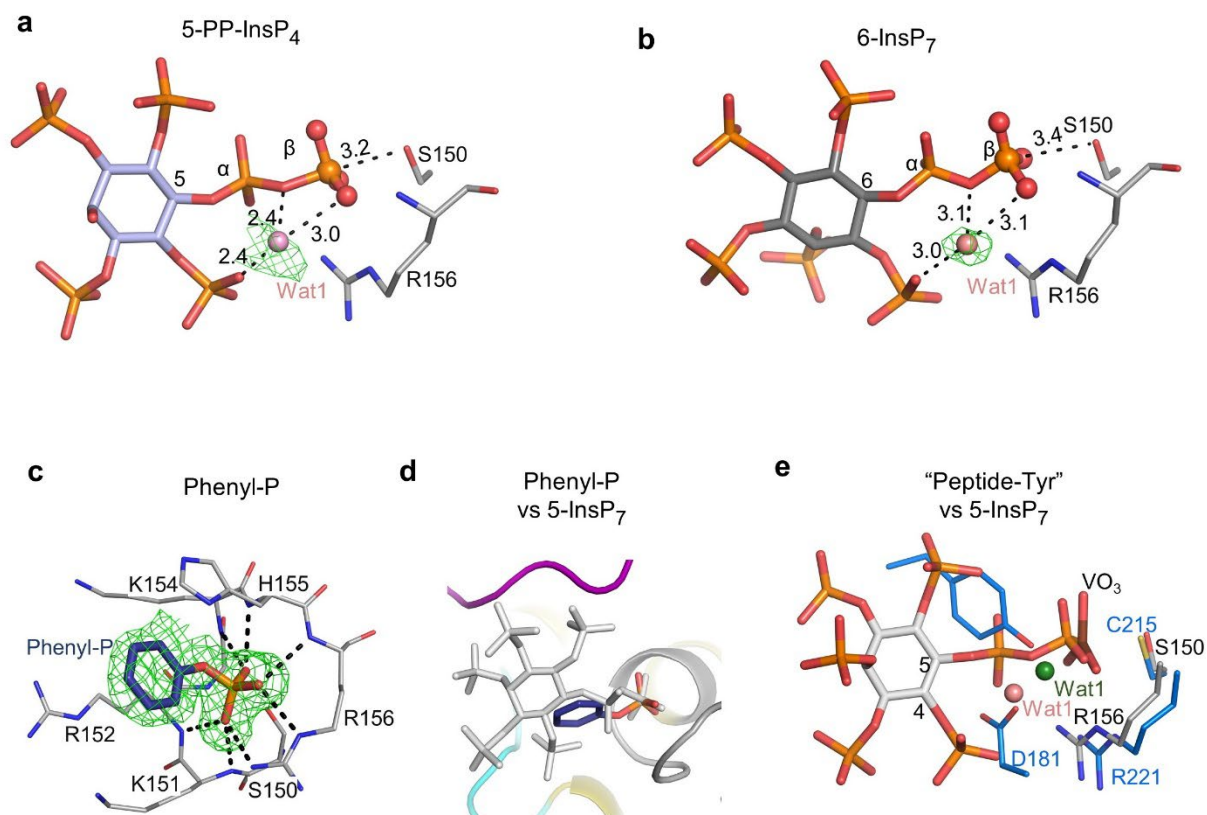

**Supplementary Figure 11. Analysis of the catalytic environment for *AtPFA-DSP1* in the absence of an Asp/Glu catalytic acid.** Data are shown from ligand/enzyme crystal complexes of *AtPFA-DSP1*<sup>49-215; C150S</sup>. Panel **a-c**, describe the positions of 5-PP-InsP<sub>4</sub>, 6-InsP<sub>7</sub> and phenyl phosphate ('Phenyl-P') respectively. Pink spheres depict Wat1 (which is not found in the complex with Phenyl-P). The omit Fo-Fc electron density maps are contoured at 3 $\sigma$  and shown in green mesh. Contacts are highlighted with black dashed line and distances are in Å. Panel **d** is a superimposition of bound 5-InsP<sub>7</sub> (white stick) and Phenyl-P (blue stick). Panel **e** is a superimposition of enzyme-bound 5-InsP<sub>7</sub> and PTP1B (marine blue) with bound peptide-tyrosine (colored blue and red) from Asp-Ala-Asp-Glu-Tyr-Leu-Tyr (PDB accession code: 3I7Z). Water is shown in green or light pink. Vanadium is shown in brown.

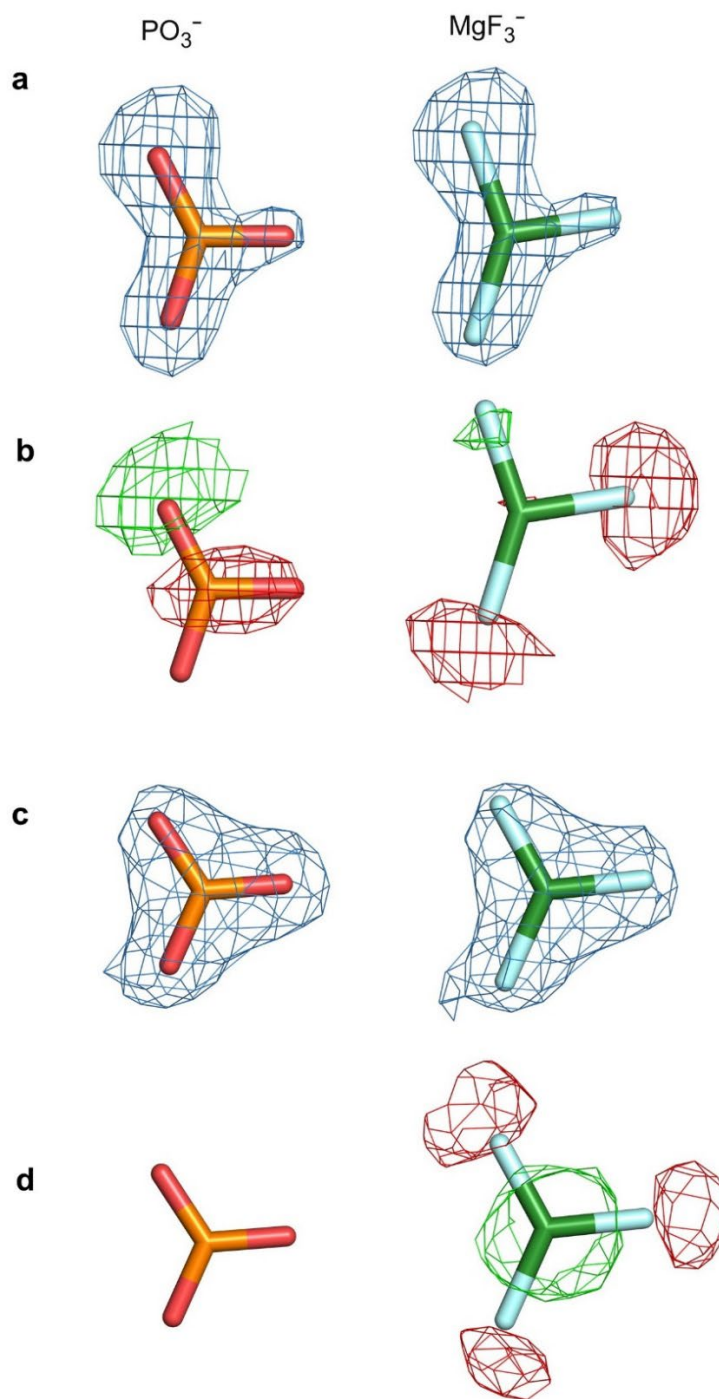

**Supplementary Figure 12. Electron density maps modeled on either  $\text{MgF}_3^-$  or a metaphosphate ( $\text{PO}_3^-$ ).** In these stick format graphics, magnesium is colored dark green, fluoride is colored cyan, phosphorus is orange and oxygen is red. The  $2m\text{Fo}-\text{Fc}$  maps (blue mesh) are contoured at  $1.5\sigma$ . The modeled  $\text{Fo}-\text{Fc}$  electron density maps are contoured at  $3\sigma$  (green mesh) and  $-3\sigma$  (red mesh). Panels **a** and **b** are obtained from experiments with *At*PFA-DSP1<sup>49-215</sup> (PDB accession code 7MOM). Panels **c** and **d** were obtained from experiments with *At*PFA-DSP1<sup>49-215</sup>; C<sup>150S</sup> (PDB accession code 7MOJ).

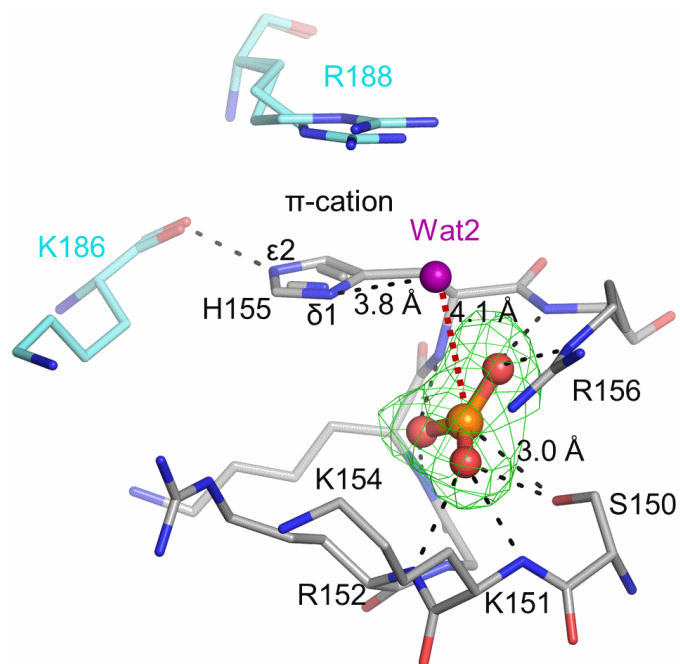

**Supplementary Figure 13. A metaphosphate-like intermediate captured in *AtPFA-DSP1*<sup>49-215; C150S</sup>.** Crystal complexes were generated by soaking 5-InsP<sub>7</sub> into the *AtPFA-DSP1*<sup>49-215; C150S</sup> mutant for 2 days at pH 7.2 followed by 1 day at pH 10 (PDB Accession code 7MOJ). Relevant amino acid residues are shown in stick format, the metaphosphate is shown in stick and ball format (phosphorus is orange; oxygens are red), and the water molecule Wat2 is shown as a purple sphere. The distance between Wat2 and phosphorous in Å is indicated by the broken red line. Other distances that are polar interactions are depicted as broken gray lines. The omit Fo-Fc electron density map is contoured at 4 $\sigma$  and shown in green mesh. His155 is shown in N <sup>$\epsilon$ 2</sup>-protonated  $\tau$  tautomer state.



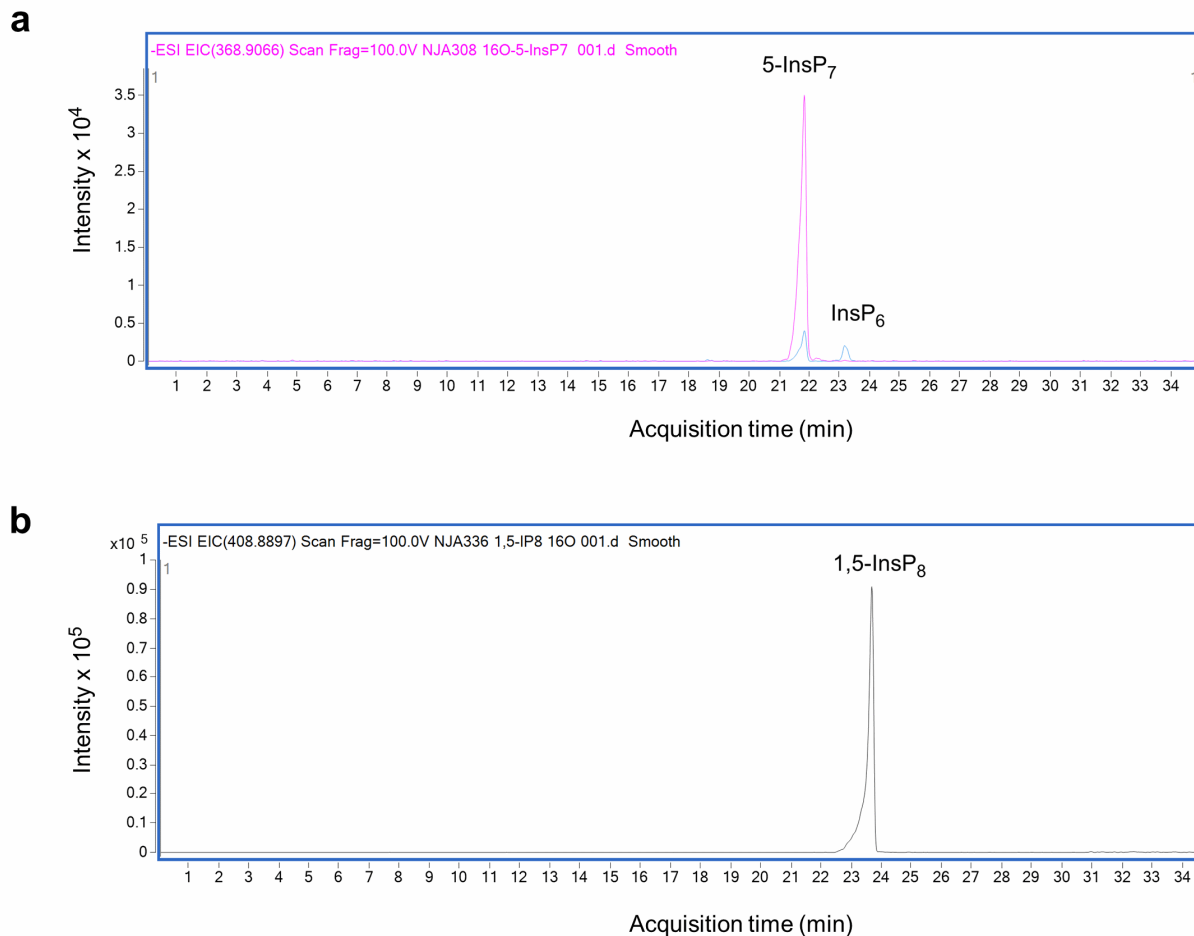

**Supplementary Figure 14. Analysis of 5-InsP<sub>7</sub> and 1,5-InsP<sub>8</sub> by capillary electrophoresis mass spectrometry.**

Panel **a** shows data for 5-InsP<sub>7</sub> (purple trace; retention time = 21.9 min) and < 5% impurities (blue trace) of InsP<sub>6</sub> (retention time = 23.1 min) and a neutral loss fragment during ionization of 5-InsP<sub>7</sub> (retention time = 21.9 min).

Panel **b** shows data for 1,5-InsP<sub>8</sub> (retention time 23.5 min) with <1% impurity.

| PDB Accession IDs           | 7MOD                | 7MOE                | 7MOF                | 7MOG                                 | 7MOH                        |
|-----------------------------|---------------------|---------------------|---------------------|--------------------------------------|-----------------------------|
| Protein                     | C150S               | C150S               | C150S               | C150S                                | C150S                       |
| Ligands                     | Pi(A)               | 5-IP <sub>7</sub>   | 6-IP <sub>7</sub>   | 5PCF <sub>2</sub> Am-IP <sub>5</sub> | 5-PP-IP <sub>4</sub> /Pi(B) |
| pH                          | 7.2                 | 7.2                 | 7.2                 | 7.2                                  | 7.2                         |
| Space group                 | P2 <sub>1</sub> 3   | P2 <sub>1</sub> 3   | P2 <sub>1</sub> 3   | P2 <sub>1</sub> 3                    | P2 <sub>1</sub> 3           |
| Cell parameters (Å)         | 125.36              | 124.6               | 124.9               | 124.65                               | 124.13                      |
| Resolution (Å)              | 50.0-1.65<br>(1.68) | 50.0-1.70<br>(1.73) | 50.0-1.95<br>(1.98) | 50-1.80<br>(1.83)                    | 50.0-1.9<br>(1.93)          |
| Rmeas*                      | 0.065<br>(0.955)    | 0.068<br>(0.721)    | 0.045<br>(0.737)    | 0.084<br>(0.853)                     | 0.049<br>(0.858)            |
| I/σ I*                      | 31.3<br>(2.5)       | 27.8<br>(2.7)       | 33.0<br>(3.1)       | 23.5<br>(3.2)                        | 40.9<br>(2.7)               |
| Completeness (%)*           | 100.0<br>(100.0)    | 99.7<br>(99.9)      | 100.0<br>(100.0)    | 100.0<br>(100.0)                     | 99.9<br>(100.0)             |
| Redundancy*                 | 7.8<br>(7.7)        | 7.8<br>(7.6)        | 7.5<br>(7.5)        | 8.2<br>(8.6)                         | 7.5<br>(7.5)                |
| Refinement                  |                     |                     |                     |                                      |                             |
| Resolution (Å)*             | 44.4-1.65<br>(1.69) | 41.6-1.7<br>(1.74)  | 39.5-1.95<br>(2.0)  | 37.6-1.80<br>(1.85)                  | 37.4-1.90<br>(1.95)         |
| Reflections (refinement)    | 74329<br>(5335)     | 67164<br>(4901)     | 45031<br>(3219)     | 56694<br>(4118)                      | 47393<br>(3417)             |
| Reflections (R-free)        | 3995<br>(286)       | 3547<br>(246)       | 2391<br>(168)       | 3020<br>(210)                        | 2524<br>(185)               |
| Rwork*                      | 0.117<br>(0.187)    | 0.120<br>(0.205)    | 0.109<br>(0.155)    | 0.119<br>(0.160)                     | 0.117<br>(0.170)            |
| Rfree*                      | 0.143<br>(0.203)    | 0.149<br>(0.232)    | 0.152<br>(0.226)    | 0.147<br>(0.186)                     | 0.148<br>(0.204)            |
| No. atoms                   |                     |                     |                     |                                      |                             |
| Protein                     | 2777                | 2659                | 2566                | 2569                                 | 2552                        |
| Ligands                     | 10                  | 80                  | 116                 | 82                                   | 77                          |
| Solvent                     | 426                 | 385                 | 337                 | 293                                  | 262                         |
| R.m.s. deviations           |                     |                     |                     |                                      |                             |
| RMS(bonds Å)                | 0.013               | 0.013               | 0.015               | 0.013                                | 0.014                       |
| RMS(angles °)               | 1.61                | 1.66                | 1.74                | 1.73                                 | 1.69                        |
| B-factors (Å <sup>2</sup> ) |                     |                     |                     |                                      |                             |
| Average                     | 23.68               | 25.54               | 30.45               | 32.23                                | 31.05                       |
| Macromolecules              | 20.77               | 21.87               | 26.42               | 29.75                                | 28.32                       |
| Ligands                     | 15.28               | 41.81               | 62.68               | 58.56                                | 54.44                       |
| Solvent                     | 42.86               | 47.49               | 50.03               | 46.61                                | 50.76                       |

| PDB Accession IDs                | 7MOI                | 7MOJ                | 7MOK                | 7MOL                | 7MOM                 |
|----------------------------------|---------------------|---------------------|---------------------|---------------------|----------------------|
| <b>Protein</b>                   | C150S               | C150S               | WT                  | WT                  | WT                   |
| <b>Ligands/Ion</b>               | Phenyl-P            | PO3                 | Pi(A)               | Pi(B)               | PO3                  |
| <b>pH</b>                        | 7.2                 | 10                  | 7.2                 | 7.2                 | 8.0                  |
| <b>Space group</b>               | P2 <sub>1</sub> 3   | P2 <sub>1</sub> 3   | P2 <sub>1</sub> 3   | P2 <sub>1</sub> 3   | P2 <sub>1</sub> 3    |
| <b>Cell parameters (Å)</b>       | 124.73              | 125.15              | 124.45              | 124.34              | 124.9                |
| <b>Resolution (Å)</b>            | 50.0-1.80<br>(1.83) | 50.0-1.90<br>(1.93) | 50.0-1.85<br>(1.88) | 50-1.90<br>(1.93)   | 50.0-1.70<br>(1.73)  |
| <b>Rmeas*</b>                    | 0.040<br>(0.931)    | 0.074<br>(0.871)    | 0.036<br>(0.820)    | 0.97<br>(0.940)     | 0.060<br>(0.969)     |
| <b>I/σ I*</b>                    | 49.6<br>(2.5)       | 27.8<br>(2.7)       | 43.0<br>(3.0)       | 27.5<br>(2.7)       | 40.8<br>(2.6)        |
| <b>Completeness (%)*</b>         | 99.9<br>(99.7)      | 100.0<br>(100.0)    | 100.0<br>(100.0)    | 100.0<br>(100.0)    | 100.0<br>(100.0)     |
| <b>Redundancy*</b>               | 6.6<br>(5.4)        | 7.5<br>(7.5)        | 9.4<br>(9.3)        | 11.3<br>(11.7)      | 10.0<br>(9.8)        |
| <b>Refinement</b>                |                     |                     |                     |                     |                      |
| <b>Resolution (Å)*</b>           | 37.6-1.80<br>(1.85) | 39.4-1.9<br>(1.95)  | 39.4-1.85<br>(1.90) | 39.4-1.90<br>(1.95) | 39.53-1.70<br>(1.74) |
| <b>Reflections (refinement)</b>  | 56394<br>(3929)     | 48867<br>(3475)     | 51942<br>(3753)     | 48048<br>(3480)     | 67721<br>(4887)      |
| <b>Reflections (R-free)</b>      | 3011<br>(198)       | 2601<br>(192)       | 2782<br>(211)       | 2561<br>(188)       | 3627<br>(270)        |
| <b>Rwork*</b>                    | 0.123<br>(0.182)    | 0.114<br>(0.170)    | 0.108<br>(0.160)    | 0.115<br>(0.183)    | 0.115<br>(0.189)     |
| <b>Rfree*</b>                    | 0.149<br>(0.216)    | 0.148<br>(0.215)    | 0.143<br>(0.224)    | 0.157<br>(0.234)    | 0.141<br>(0.200)     |
| <b>No. atoms</b>                 |                     |                     |                     |                     |                      |
| <b>Protein</b>                   | 2526                | 2639                | 2809                | 2645                | 2792                 |
| <b>Ligands</b>                   | 22                  | 8                   | 10                  | 10                  | 8                    |
| <b>Solvent</b>                   | 301                 | 445                 | 391                 | 365                 | 438                  |
| <b>R.m.s. deviations</b>         |                     |                     |                     |                     |                      |
| <b>RMS(bonds Å)</b>              | 0.013               | 0.014               | 0.014               | 0.015               | 0.013                |
| <b>RMS(angles °)</b>             | 1.59                | 1.71                | 1.7                 | 1.89                | 1.74                 |
| <b>B-factors (Å<sup>2</sup>)</b> |                     |                     |                     |                     |                      |
| <b>Average</b>                   | 29.01               | 30.47               | 30.41               | 28.21               | 23.01                |
| <b>Macromolecules</b>            | 26.93               | 26.32               | 27.99               | 25.47               | 20.00                |
| <b>Ligands</b>                   | 31.02               | 31.5                | 27.49               | 25.07               | 22.69                |
| <b>Solvent</b>                   | 46.33               | 55.06               | 47.89               | 48.12               | 42.22                |

**Supplementary Table 1. Structural data collection and refinement statistics.** \*The numbers in parentheses are given for the highest resolution shell.

| Atom name | Atomic charge (e) |
|-----------|-------------------|
| P         | 0.3437            |
| O1        | -0.7240           |
| O2        | -0.5060           |
| O3        | -0.7225           |
| O4        | -0.7297           |
| HO2       | 0.3385            |

**Supplementary Table 2. Gaussian charges.** Charges were calculated using the CM5 method using gaussian.09.

| Atom name | Gaff2 atom type | Partial atomic charge (e) |
|-----------|-----------------|---------------------------|
| P         | p5              | 0.3437                    |
| O1        | oh              | -0.7254                   |
| O2        | o               | -0.5060                   |
| O3        | o               | -0.7254                   |
| O4        | o               | -0.7254                   |
| HO2       | ho              | 0.3385                    |

**Supplementary Table 3. Gaff2 atom type and atomic charge parameters applied to the phosphate ion.**

### Supplementary Reference

1. Wang, H., Gu, C., Rolfes, R.J., Jessen, H.J. & Shears, S.B. Structural and biochemical characterization of Siw14: A protein-tyrosine phosphatase fold that metabolizes inositol pyrophosphates. *J Biol Chem* **293**, 6905-6914 (2018).
