# Supplementary material for: A structural exposé of noncanonical molecular reactivity within the protein tyrosine phosphatase WPD loop
Source: PubMed Central journal article supplement (PMC9038691; doi:10.1038/s41467-022-29673-y), 2022-04-25
Supplement: 41467_2022_29673_MOESM2_ESM.pdf [file 41467_2022_29673_MOESM2_ESM.pdf]

## **Description of Additional Supplementary Files**

File name: Supplementary Movie 1

Description: Molecular dynamics simulation a: phosphate mobility inside the catalytic center of *AtPFA-DSP1*

File name: Supplementary Movie 2

Description: Molecular dynamics simulation b: phosphate mobility inside the catalytic center of *AtPFA-DSP1*

File name: Supplementary Movie 3

Description: Molecular dynamics simulation c: phosphate mobility inside the catalytic center of *AtPFA-DSP1*

File name: Supplementary Movie 4

Description: Molecular dynamics simulation d: phosphate mobility inside the catalytic center of *AtPFA-DSP1*
